# Supplementary material for: CRISPR–Cas12a with split crRNA for the direct and sensitive detection of microRNA
Source: Royal Society of Chemistry journal article supplement (doi:10.1039/d5an00142k), 2025-01-01
Supplement: d5an00142k1.pdf [file d5an00142k1.pdf]

## CRISPR-Cas12a with split crRNA for the direct and sensitive detection of microRNA

Sijia Yang<sup>a,#</sup>, Lei Ren<sup>b,#</sup>, Ningke Fan<sup>a,#</sup>, Shuhao Wang<sup>c</sup>, Bo Shen<sup>d</sup>, Zhongmei Liu<sup>a</sup>, Xinmin Li<sup>d\*</sup>, Shijia Ding<sup>a\*</sup>

<sup>a</sup> Key Laboratory of Clinical Laboratory Diagnostics (Ministry of Education), College of Laboratory Medicine, Chongqing Medical University, Chongqing 400016, China

<sup>b</sup> Health Management Center, The First Affiliated Hospital of Chongqing Medical University, Chongqing 400016, China

<sup>c</sup> School of Chemistry and Chemical Engineering, Zhejiang Sci-Tech University, Zhejiang 310018, China

<sup>d</sup> Department of Laboratory Medicine, Chongqing Hospital of Traditional Chinese Medicine, Chongqing 400016, China

**Table S1** DNA sequences in this work

| DNA           | Sequence (5'-3')       |
|---------------|------------------------|
| reporter      | FAM-TTATTATT-BHQ1      |
| Activator-DNA | TCAACATCAGTCTGATAAGCTA |

**Table S2** RNA sequences in this work

| RNA          | Sequence (5'-3')        |
|--------------|-------------------------|
| miR-21       | UAGCUUAUCAGACUGAUGUUGA  |
| miRNA-1      | UAGCUUCUCAGACUGAUGUUGA  |
| miRNA-2      | UAGCUUCUCAGACAGAUGUUGA  |
| miRNA-3      | UAGCUUCUCACACAGAUGUUGA  |
| miRNA-4      | UAGCUUAUCUCCUGAUGUUGA   |
| miR-20a      | UAAAGUGCUUAUAGUGCAGGUAG |
| miR-106a     | AAAAGUGCUUACAGUGCAGGUAG |
| crRNA-handle | UAAUUUCUACUAAGUGUAGAU   |

**Table S3.** The recoveries determined using the developed method via spiking synthetic miRNA-21 into 10% diluted normal serum samples.

| Sample | Added (pM) | Founded (pM) | Recovery | RSD  |
|--------|------------|--------------|----------|------|
| 1      | 250        | 293.91       | 117.6%   | 6.2% |
| 2      | 500        | 571.6        | 114.3%   | 5.3% |
| 3      | 750        | 722.45       | 96.33%   | 3%   |
| 4      | 1000       | 1138.16      | 113.8%   | 1.8% |
